# Supplementary material
Source: Springer Nature journal article supplement (https://www.springermedizin.de/resource/supplementary/12877_2013_1087_MOESM1_ESM.pdf/9440816)
Supplement: MOESM1 [file 9440816]

Enrolment

Baseline 1 (n=98)  
All relatives (PWD) to attend CST groups for 7 weeks

Baseline 2 (n=85)  
Randomisation of participants

Allocation

Allocated to intervention  
Maintenance CST  
(n =41)

Allocated to control  
Treatment as Usual  
(n =44)

Follow up 1

Assessed at Follow up 1  
(n =34)

Assessed at Follow up 1  
(n =37)

Follow up 2

Assessed at Follow up 2  
(n =29)

Assessed at Follow up 2  
(n =34)
